# Supplementary material for: Protein–inorganic hybrid system for efficient his-tagged enzymes immobilization and its application in l-xylulose production
Source: Royal Society of Chemistry journal article supplement (doi:10.1039/c6ra24404a), 2017-01-01
Supplement: c6ra24404a1.pdf [file c6ra24404a1.pdf]

## Supporting Information

### Protein-inorganic hybrid system for efficient his-tagged enzymes immobilization and its application in L-xylulose production

Sanjay K. S. Patel,<sup>a</sup> Sachin V. Otari,<sup>a</sup> Yun Chan Kang,<sup>\*b</sup> and Jung-Kul Lee<sup>\*a</sup>

<sup>a</sup> Department of Chemical Engineering, Konkuk University, 120 Neungdong-Ro, Gwangjin-Gu, Seoul  
05029, South Korea

<sup>b</sup> Department of Materials Science and Engineering, Korea University, Anam-Dong, Seongbuk-Gu, Seoul  
02841, South Korea

\*Corresponding author. Mailing address:

Department of Chemical Engineering, Konkuk University, Seoul 05029, South Korea. *E-mail:*

*[jkrhee@konkuk.ac.kr](mailto:jkrhee@konkuk.ac.kr); Fax: +82-2-458-3504; Tel: +82-2-450-3505*

Department of Materials Science and Engineering, Korea University, Seoul 02841, South Korea. *E-mail:*

*[yckang@korea.ac.kr](mailto:yckang@korea.ac.kr); Fax: +82-2-928-3584; +82-2-3290-3282.*

**Table S1.** Synthesis of recombinant enzyme nanoflowers as enzyme-Cu(PO<sub>4</sub>)<sub>3</sub>·H<sub>2</sub>O hybrids.

| Method<br>(Reference)   | Synthesis conditions                             | Enzyme              |                     |            |            |
|-------------------------|--------------------------------------------------|---------------------|---------------------|------------|------------|
|                         |                                                  | HjLAD               |                     | SpNox      |            |
|                         |                                                  | EY <sup>a</sup> (%) | RA <sup>b</sup> (%) | EY (%)     | RA (%)     |
| 1 (3)                   | Cu (0.8 mM) and incubation of<br>3 days at 25 °C | 66.8 ± 4.3          | 14.4 ± 2.1          | 64.2 ± 4.0 | 17.1 ± 1.2 |
| 2 (28)                  | Cu (6 mM) and incubation of<br>24 h at 4 °C      | 51.2 ± 4.1          | 90.0 ± 3.3          | 44.9 ± 3.7 | 71.6 ± 4.7 |
| 3 ( <b>This study</b> ) | Cu (2 mM) and incubation of<br>24 h at 4 °C      | 63.4 ± 5.8          | 246 ± 21            | 58.9 ± 5.7 | 144 ± 16   |

<sup>a</sup> Encapsulation yield; <sup>b</sup> Relative activity.

Relative activity of the free enzyme was considered as 100%.

**Table S2.** Comparison of his-tagged enzymes immobilization through organic-inorganic hybrid systems.

| Enzyme                            | Organic-inorganic hybrid system                         |             | RA <sup>a</sup> (%) | Reference         |
|-----------------------------------|---------------------------------------------------------|-------------|---------------------|-------------------|
|                                   | Complex                                                 | Morphology  |                     |                   |
| Bs-ADH                            | Cu <sub>3</sub> (PO <sub>4</sub> ) <sub>2</sub> -enzyme | Nano-flower | 1.74                | 3                 |
|                                   | Co <sub>3</sub> (PO <sub>4</sub> ) <sub>2</sub> -enzyme | Sponge      | 44.0                |                   |
| Ll-ADH                            | Cu <sub>3</sub> (PO <sub>4</sub> ) <sub>2</sub> -enzyme | Nano-flower | 42.0                | 3                 |
|                                   | Co <sub>3</sub> (PO <sub>4</sub> ) <sub>2</sub> -enzyme | Sponge      | 94.0                |                   |
| Epoxide hydrolase                 | Fmoc-diphenylalanine-polyethyleneimine-silicate-enzyme  | Capsule     | 60.0                | 40                |
| ADP-dependent glucokinase         | Diatom silica-enzyme                                    | Film        | 90.0                | 41                |
| Cellulase                         | Diatom silica-enzyme                                    | Film        | 75.0                | 41                |
| Glucose-6-phosphate dehydrogenase | Diatom silica-enzyme                                    | Film        | 80.0                | 41                |
| HjLAD                             | Cu <sub>3</sub> (PO <sub>4</sub> ) <sub>2</sub> -enzyme | Nano-flower | 246                 | <b>This study</b> |
| SpNox                             | Cu <sub>3</sub> (PO <sub>4</sub> ) <sub>2</sub> -enzyme | Nano-flower | 144                 |                   |

<sup>a</sup> Relative activity.

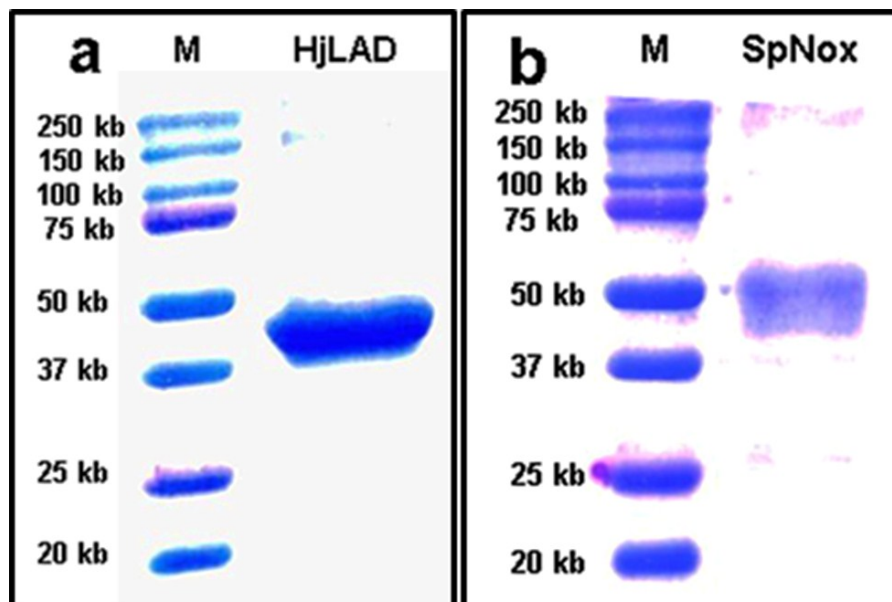

**Fig. S1** SDS-PAGE analysis of purified enzymes (Lane M contains the protein markers). a) HjLAD (~41 kDa) and b) SpNox (50 kDa).

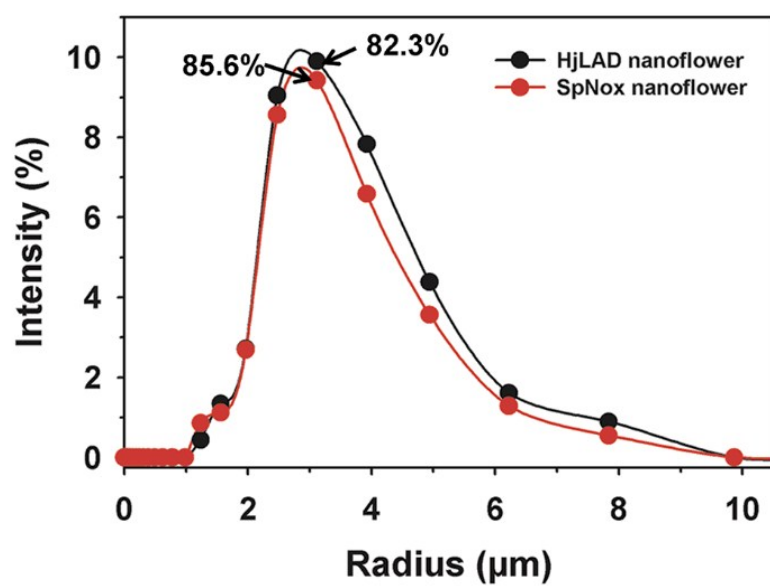

**Fig. S2** DLS analysis of the particle distribution of synthesized nanoflowers.

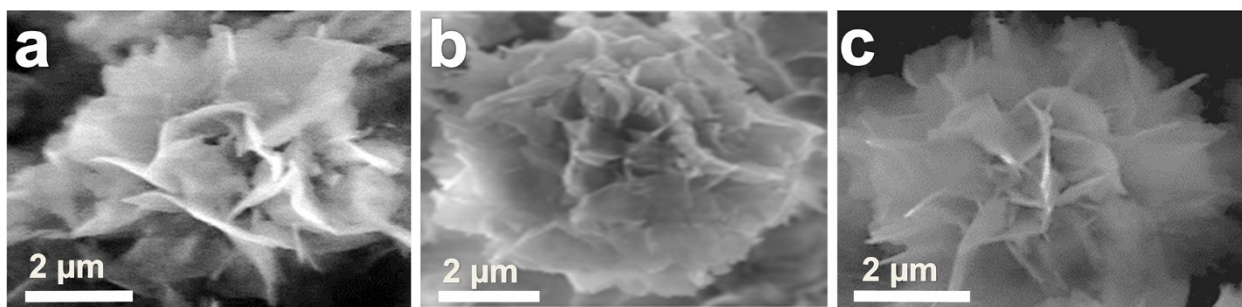

**Fig. S3** FE-SEM analysis of the synthesized HJLAD nanoflower at pH 6.5 (a), 7.4 (b), and 8.0 (c) in phosphate buffer (10 mM).

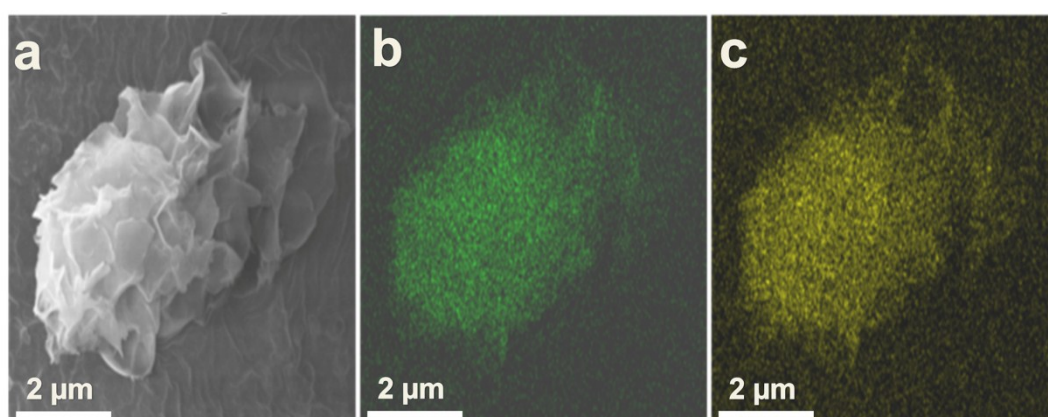

**Fig. S4** FE-SEM analysis of the synthesized HJLAD nanoflower (a), and elemental mapping images of copper (b) and phosphorous (c).
